# Supplementary material for: TGF-β1 contributes to CD8+ Treg induction through p38 MAPK signaling in ovarian cancer microenvironment
Source: PubMed Central journal article supplement (PMC5190116; doi:10.18632/oncotarget.10003), 2016-06-14
Supplement: oncotarget-07-44534-s001.pdf [file oncotarget-07-44534-s001.pdf]

## TGF- $\beta$ 1 contributes to CD8<sup>+</sup> Treg induction through p38 MAPK signaling in ovarian cancer microenvironment

### SUPPLEMENTARY FIGURES

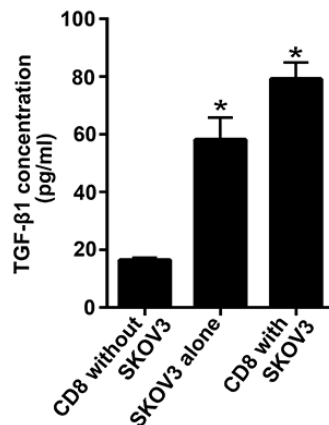

**Supplementary Figure S1: Expression of TGF- $\beta$ 1 in CD8<sup>+</sup> T cells and SKOV3 co-culture supernatants.** Production of TGF- $\beta$ 1 in co-culture supernatants that SKOV3 cultured alone and CD8<sup>+</sup> T cells cultured with/without SKOV3 were detected by ELISA, \* $P$ <0.05.

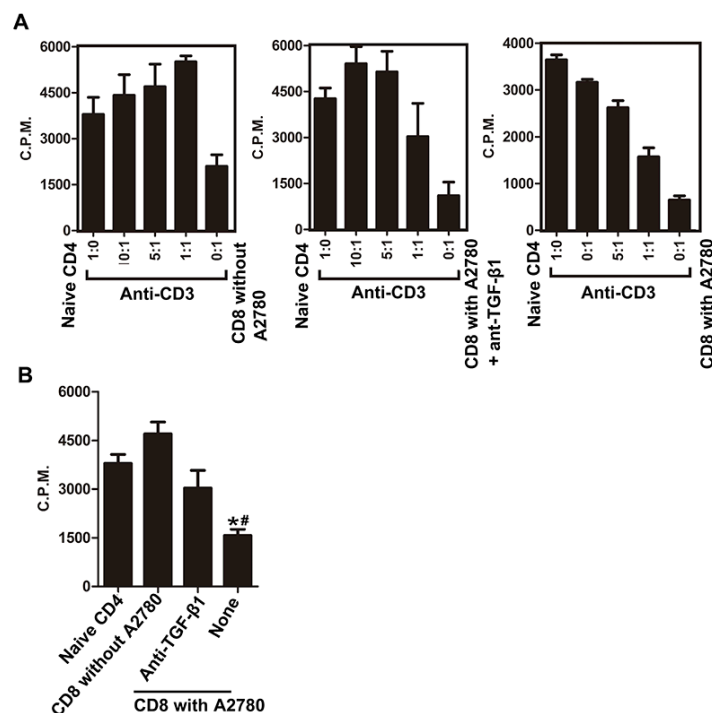

**Supplementary Figure S2: Blockade of TGF- $\beta$ 1 abrogates the suppressive function of CD8<sup>+</sup> T cells from the co-culture system.** **A.** CD8<sup>+</sup> T cells cultured with A2780 suppressed naïve CD4<sup>+</sup> T cell proliferation in a dose-dependent manner with stimulation by anti-CD3 mAb. Conversely, CD8<sup>+</sup> T cells co-cultured with A2780 in the presence of TGF- $\beta$ 1-neutralizing antibody or CD8<sup>+</sup> T cells cultured alone did not have the suppressive activity. The proliferative response was determined by [<sup>3</sup>H] thymidine uptake. **B.** Suppressive effects of cocultured CD8<sup>+</sup> T cells on naïve CD4<sup>+</sup> T cells was analyzed in a ratio of 1:1, the suppressor effect of CD8<sup>+</sup> T cells cultured with A2780 was in part blocked when the assay was performed in the presence of TGF- $\beta$ 1-neutralizing antibody. Results are expressed as mean cpm  $\pm$  SEM of three independent experiments. \* $P$ <0.05 compared with CD8<sup>+</sup> T cells cultured alone. # $P$ <0.05 compared with A2780 cells co-cultured with TGF- $\beta$ 1-neutralizing antibody.

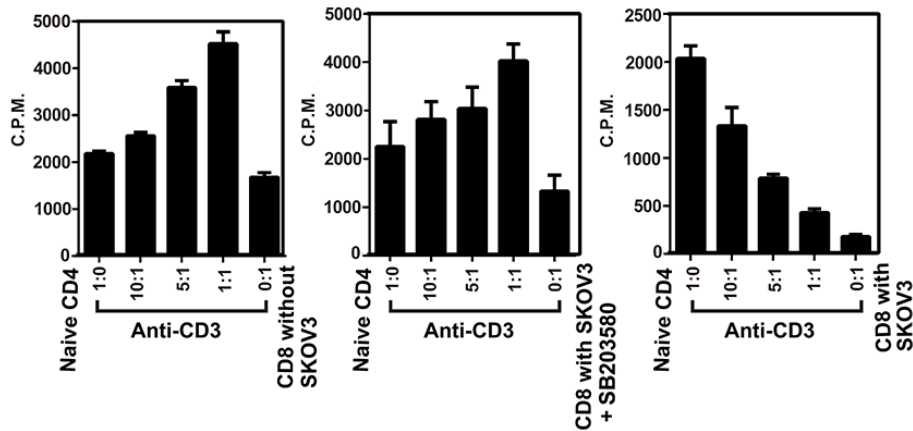

**Supplementary Figure S3: p38 MAPK inhibitor SB203580 inhibit the suppressive function of CD8<sup>+</sup> Tregs on naïve CD4<sup>+</sup> T cells.** CD8<sup>+</sup> T cells were treated with 10 μM p38-specific inhibitor SB203580 for 2 h, and then cultured with OC cell line SKOV3. CD8<sup>+</sup> T cells co-cultured with SKOV3 possess significant suppressive activity for naïve CD4<sup>+</sup> T cells. No suppressive activity was exhibited by SB203580 treated CD8<sup>+</sup> T cells or CD8<sup>+</sup> T cells alone.

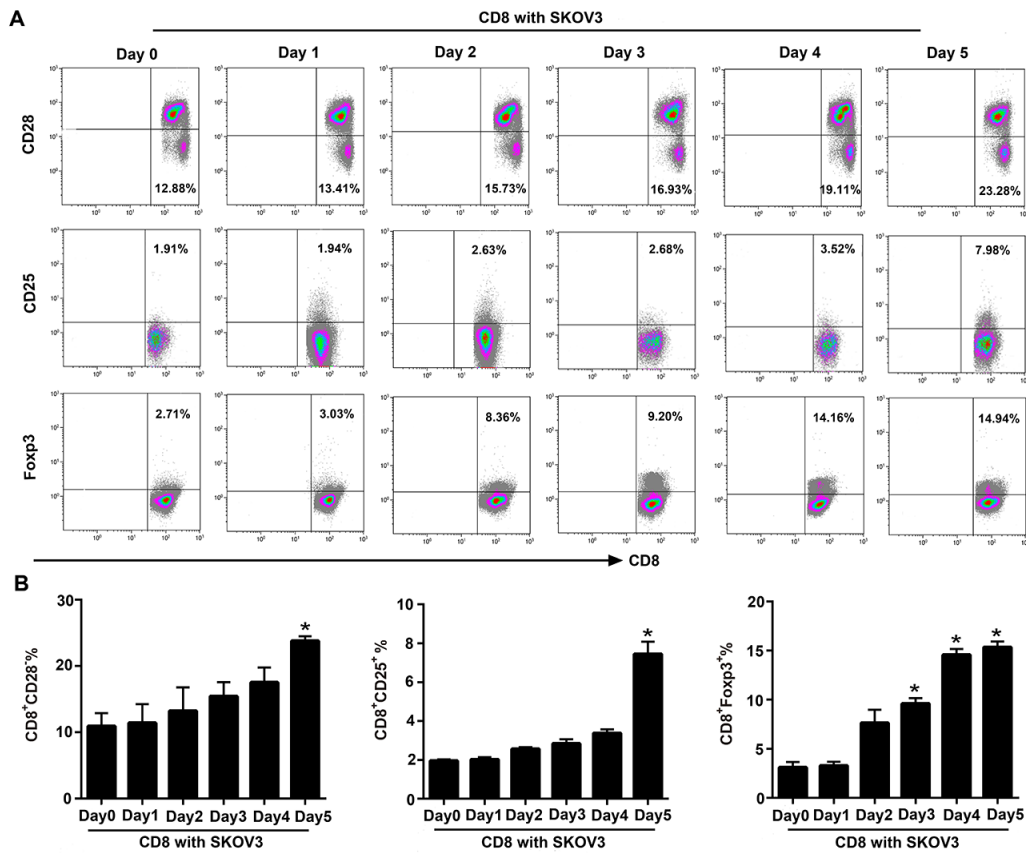

**Supplementary Figure S4: CD8<sup>+</sup>FoxP3<sup>+</sup>Tregs is more easily induced by tumor-derived TGF-β1.** **A.** Representative flow cytometry analysis of CD28, CD25, and Foxp3 staining of CD8<sup>+</sup>T cells co-cultured with SKOV3 cells in five consecutive days. **B.** The percentages of CD8<sup>+</sup>FoxP3<sup>+</sup>Tregs was significant increased in day 3 in CD8<sup>+</sup> T cell cultured with SKOV3 system compared with CD8<sup>+</sup> T cell in day 0, while the percentages of CD8<sup>+</sup>CD28<sup>+</sup> Tregs and CD8<sup>+</sup>CD25<sup>+</sup> Tregs were significant increased in day 5.
